# Supplementary material for: Polyoxometalate/Cellulose Nanofibrils Aerogels for Highly Efficient Oxidative Desulfurization
Source: MDPI journal article supplement (doi:10.3390/molecules27092782), 2022-04-27
Supplement: s1 [file s1]

# Polyoxometalate/cellulose nanofibrils aerogels for highly efficient oxidative desulfurization

Rui Song <sup>1</sup>, Xueqin Zhang <sup>2</sup>, Huihui Wang <sup>1</sup>, and Chuanfu Liu <sup>1,\*</sup>

1 State Key Laboratory of Pulp and Paper Engineering, South China University of Technology, Guangzhou China, SRsongrui711@163.com (R.S); zhangxueqin0228@163.com (X.Z.); whh@scut.edu.cn (H.W.).

2 College of Light industry and Food Science, Zhongkai University of Agriculture and Engineering, Guangzhou, Guangdong, 510225, China

\* Correspondence: chfliu@scut.edu.cn (C.L.); Tel.: +86-20-8711-1735 (C.L.)

**Table S1.** BET surface areas, pore volumes and pore sizes of the aerogels.

| Sample       | BET                                  |                        |                                        |
|--------------|--------------------------------------|------------------------|----------------------------------------|
|              | BET surface area (m <sup>2</sup> /g) | Average pore size (nm) | Total pore volume (cm <sup>3</sup> /g) |
| CNF          | 6.77                                 | 5.56                   | 0.01                                   |
| CNF/PTA50%   | 14.71                                | 3.65                   | 0.01                                   |
| A-CNF/PTA50% | 7.08                                 | 7.97                   | 0.01                                   |

**Table S2.** BJH surface areas, pore sizes of the aerogels.

| Sample       | BJH of pores                                           |                                                        |                                       |                                       |
|--------------|--------------------------------------------------------|--------------------------------------------------------|---------------------------------------|---------------------------------------|
|              | Adsorption cumulative surface area (m <sup>2</sup> /g) | Desorption cumulative surface area (m <sup>2</sup> /g) | Adsorption average pore diameter (nm) | Desorption average pore diameter (nm) |
| CNF          | 4.27                                                   | 8.50                                                   | 6.90                                  | 4.85                                  |
| CNF/PTA50%   | 10.22                                                  | 17.80                                                  | 4.36                                  | 2.97                                  |
| A-CNF/PTA50% | 6.04                                                   | 7.41                                                   | 6.15                                  | 4.24                                  |

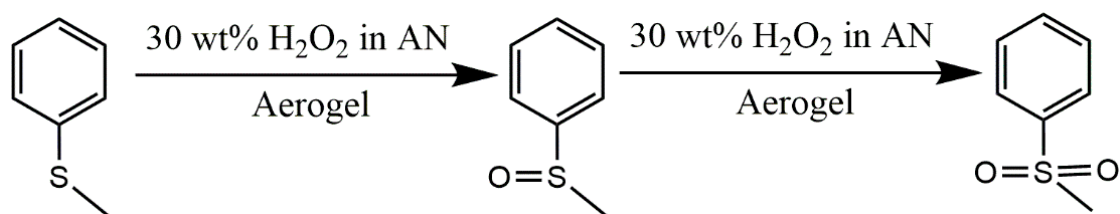

**Figure S1.** Catalysis process of PTA.

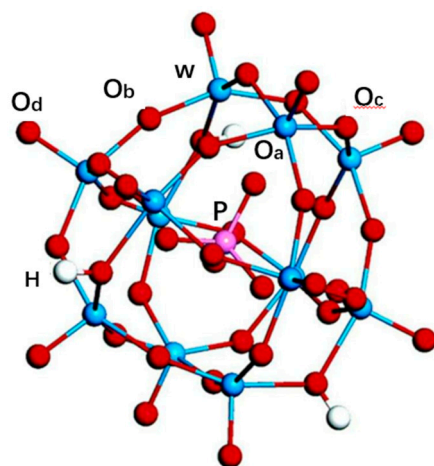

**Figure S2.** The structure of PTA ( $\text{H}_3\text{O}_{40}\text{PW}_{12} \cdot x\text{H}_2\text{O}$ ).

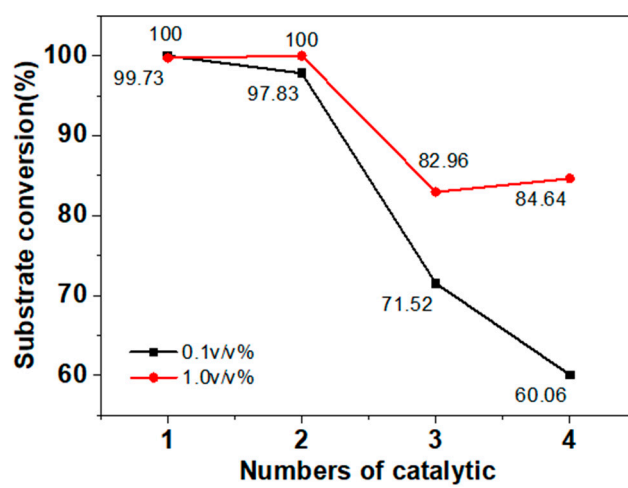

**Figure S3.** Effect of different APS addition amount on cyclic catalysis.

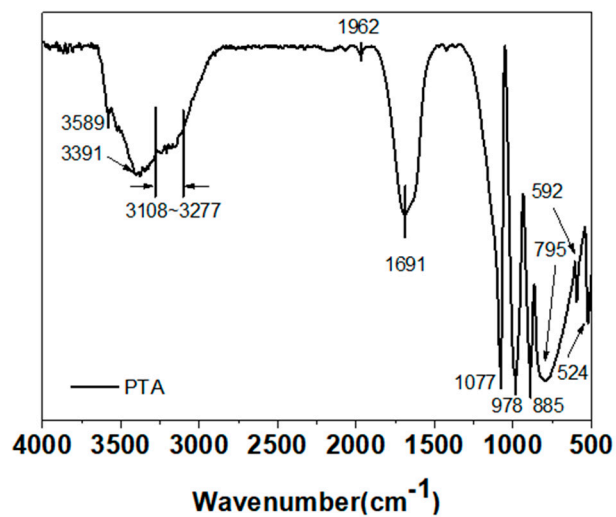

**Figure S4.** UV spectrum of PTA ( $\text{H}_3\text{O}_{40}\text{PW}_{12}\cdot x\text{H}_2\text{O}$ ).

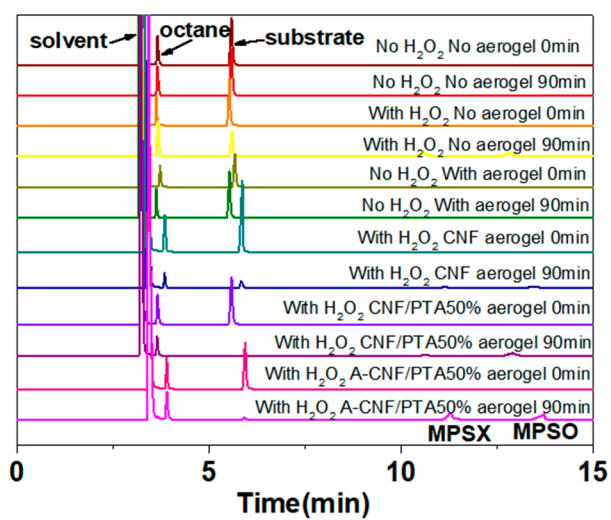

**Figure S5.** GC chromatograms of different catalytic reactions at 0min and 90min.

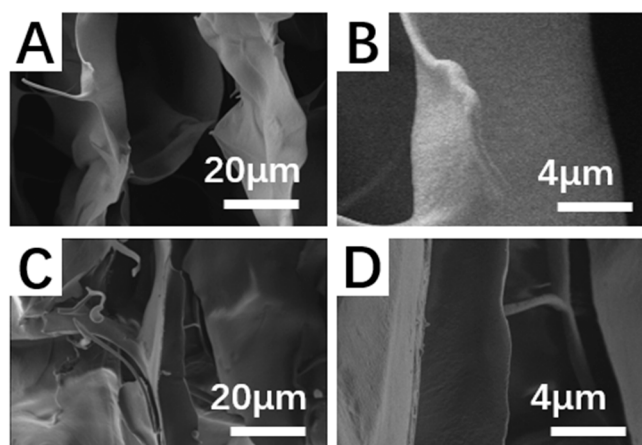

**Figure S6.** SEM of aerogels before(A,B) and after catalytic reaction(C,D).
